# Supplementary material for: An Intelligent ECG-Based Tool for Diagnosing COVID-19 via Ensemble Deep Learning Techniques
Source: MDPI journal article supplement (doi:10.3390/bios12050299), 2022-05-05
Supplement: s1 [file s1]

Article

# An Intelligent ECG-Based Tool for Diagnosing COVID-19 via Ensemble Deep Learning Techniques

Omneya Attallah

Department of Electronics and Communications Engineering, College of Engineering and Technology, Arab Academy for Science, Technology and Maritime Transport, Alexandria 1029, Egypt; o.attallah@aast.edu

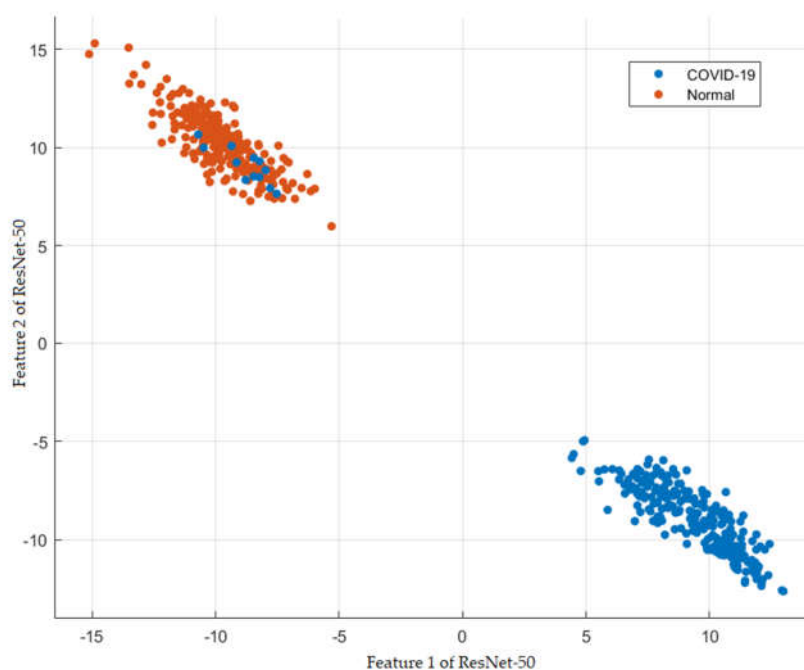

**Figure S1.** a two-dimensional scatter plot of the first two features of the feature space for the binary classification level.

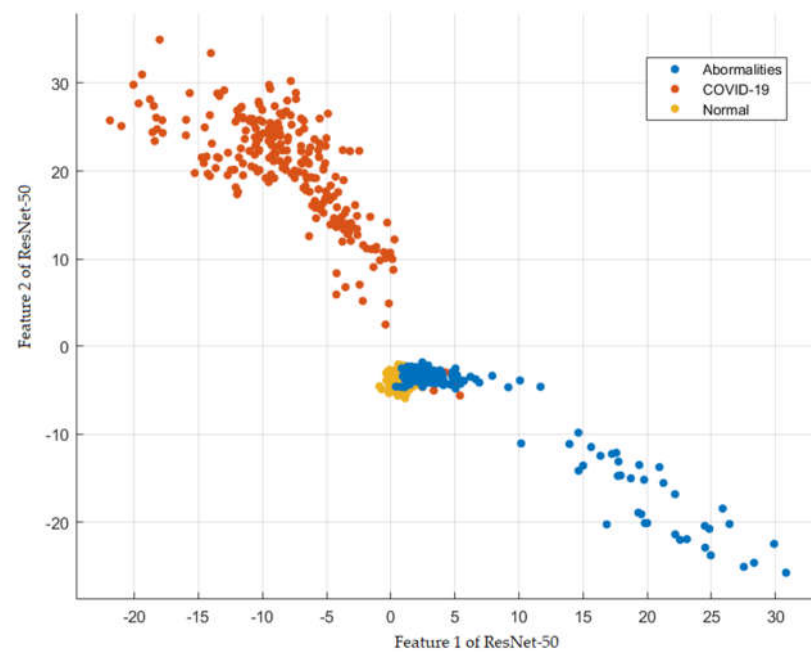

**Figure S2.** a two-dimensional scatter plot of the first two features of the feature space for the multiclass classification level.

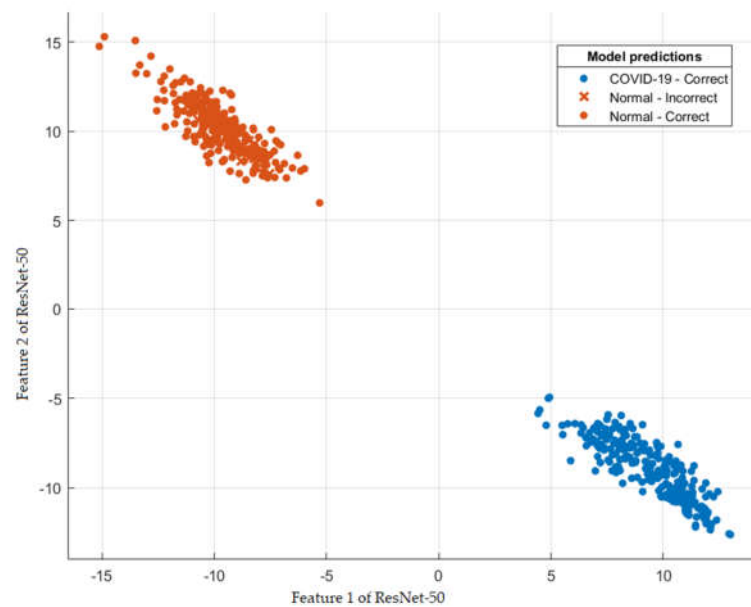

**Figure S3.** a two-dimensional scatter plot of the LDA prediction using the first two features of the feature space for the binary classification level.

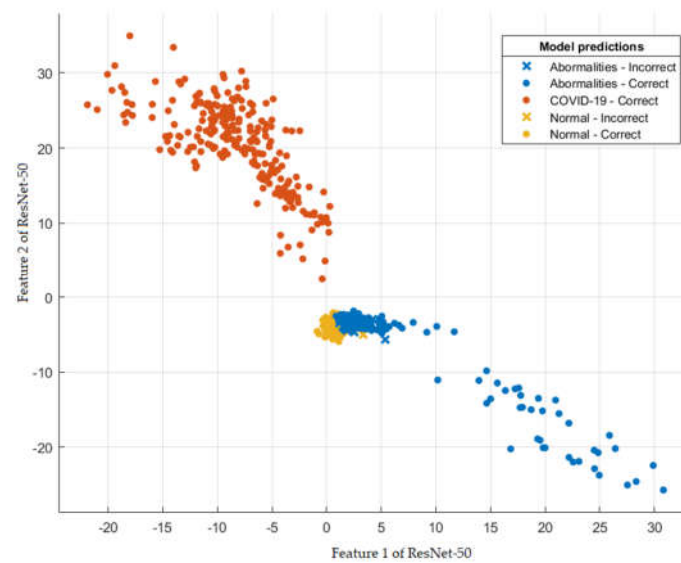

**Figure S4.** a two-dimensional scatter plot of the LDA prediction using the first two features of the feature space for the multiclass classification level.

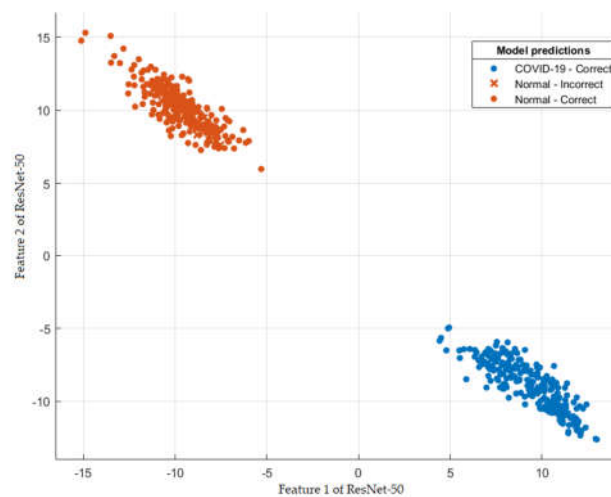

**Figure S5.** title; a two-dimensional scatter plot of the QDA prediction using the first two features of the feature space for the binary classification level.

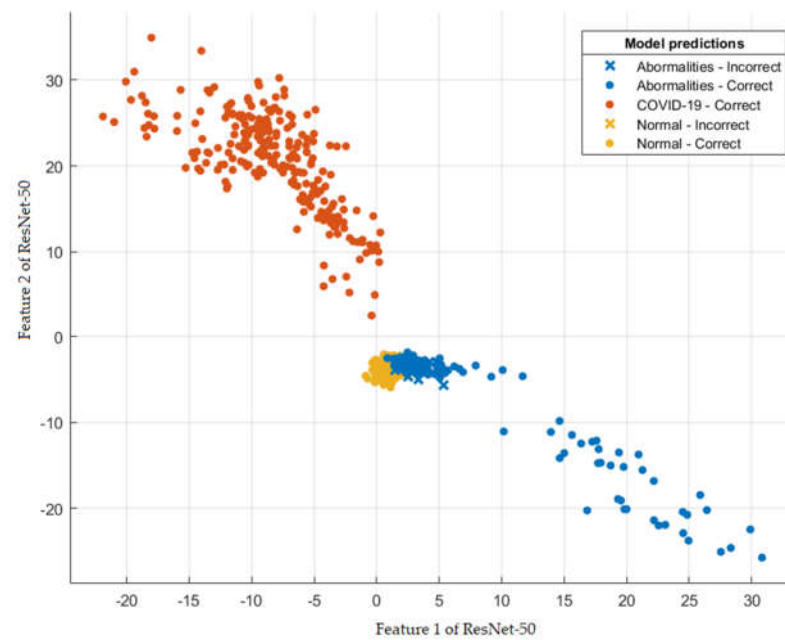

**Figure S6.** a two-dimensional scatter plot of the QDA prediction using the first two features of the feature space for the multiclass classification level.
